# Supplementary material for: Integrated Lot Sizing in Serial Supply Chains with Production Capacities
Source: Atypon-hosted journal article supplement (doi:10.1287/mnsc.1050.0378), 2005-11-01
Supplement: mnsc.1050.0378-sm-vanhoesel_etal_ecompanion.pdf [file mnsc.1050.0378-sm-vanhoesel_etal_ecompanion.pdf]

# Integrated lot-sizing in serial supply chains with production capacities

Stan van Hoesel\*    H. Edwin Romeijn<sup>†‡</sup>    Dolores Romero Morales<sup>§‡</sup>  
Albert P.M. Wagelmans<sup>¶</sup>

January 31, 2005

---

\*Faculty of Economics and Business Administration, Maastricht University, P.O. Box 616, 6200 MD Maastricht, The Netherlands; e-mail: [s.vanhoesel@ke.unimaas.nl](mailto:s.vanhoesel@ke.unimaas.nl).

<sup>†</sup>Department of Industrial and Systems Engineering, University of Florida, 303 Weil Hall, P.O. Box 116595, Gainesville, Florida 32611-6595; e-mail: [romeijn@ise.ufl.edu](mailto:romeijn@ise.ufl.edu).

<sup>‡</sup>The work of this author was supported by the National Science Foundation under Grants No. DMI-0085682 and DMI-0355533, Maastricht Research School of Economics of Technology and Organizations (METEOR), and the Netherlands Organization for Scientific Research (NWO).

<sup>§</sup>Saïd Business School, University of Oxford, Park End Street, Oxford OX1 1HP, United Kingdom; e-mail: [Dolores.Romero-Morales@sbs.ox.ac.uk](mailto:Dolores.Romero-Morales@sbs.ox.ac.uk).

<sup>¶</sup>Econometric Institute, Erasmus University Rotterdam, P.O. Box 1738, 3000 DR Rotterdam, The Netherlands; e-mail: [wagelmans@few.eur.nl](mailto:wagelmans@few.eur.nl).

# Appendix

## The uncapacitated multi-level lot-sizing problem

When the problem is uncapacitated, each arc that carries a positive flow is a free arc. Zangwill [20] used this property to show that an extreme feasible solution  $(y, x, I)$  induces a so-called *arborescent* flow in the network. Figure 4 shows an example of an arborescent flow.

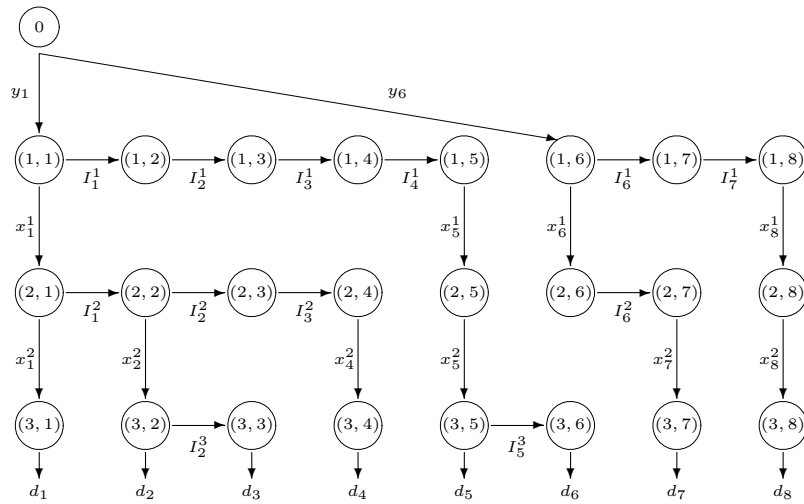

Figure 4: Example of an arborescent flow.

Since an arborescent flow does not contain any undirected cycle, we can conclude that, in an extreme feasible solution, each node in the network has at most one incoming arc carrying flow. An immediate consequence is the standard ZIO property in all levels. In Section 4.3.2, we defined the ZIO property for levels in  $\{2, \dots, L\}$ . For level 1, this property says that

$$I_t^1 y_{t+1} = 0 \quad t = 1, \dots, T-1.$$

**Corollary A.1** *Let  $(P)$  have no capacities on production. Then, the ZIO property holds at all levels for any extreme point solution to  $(P)$ .*

Another important consequence of the structure of the extreme flows concerns the value of the flow on each arc.

**Corollary A.2** *Let  $(P)$  have no production capacities. Then an extreme feasible solution  $(y, x, I)$  of  $(P)$  has the property that each arc that carries positive flow satisfies the entire demand of a set of consecutive periods.*

**Proof:** Since each node has indegree at most one, this property follows immediately by using backward induction.  $\square$

Zangwill [20] used this property to develop a dynamic programming algorithm to solve the  $L$ -level uncapacitated lot-sizing problem. His dynamic programming recursion is a backward recursion in terms of the quantities  $C_{t\ell}(s_1, s_2)$ , which are defined to be the optimal transportation and inventory costs of shipping  $d_{s_1 s_2}$  units from level  $\ell$  at time  $t$  to their destinations, i.e., demand nodes  $s_1, \dots, s_2$ , as well as the quantities. The production costs are, in this dynamic programming algorithm, represented at level  $\ell = 0$ , which essentially means that we have here split the manufacturer into production ( $\ell = 0$ ) and storage ( $\ell = 1$ ) facilities. Clearly,  $C_{TL}(T, T) = 0$ , and we are interested in  $C_{10}(1, T)$ . Zangwill's recursions now read

- at the retailer level:

$$C_{tL}(t, s_2) = h_t^L(d_{t+1, s_2}) + C_{t+1, L}(t+1, s_2) \quad t = T-1, \dots, 1; s_2 = T, \dots, t;$$

- at the last warehouse level:

$$C_{t, L-1}(s_1, s_2) = h_t^{L-1}(d_{s_1 s_2}) + C_{t+1, L-1}(s_1, s_2)$$

$$t = T-1, \dots, 1; s_1 = T, \dots, t+1; s_2 = T, \dots, s_1$$

$$C_{t, L-1}(t, s_2) = \min_{\tau=t, \dots, s_2} \left\{ c_t^{L-1}(d_{t\tau}) + C_{tL}(t, \tau) + h_t^{L-1}(d_{\tau+1, s_2}) + C_{t+1, L-1}(\tau+1, s_2) \right\}$$

$$t = T-1, \dots, 1; s_2 = T, \dots, t$$

$$C_{T,L-1}(T, T) = c_T^{L-1}(d_{TT});$$

- at the remaining warehouse levels:

$$C_{t\ell}(s_1, s_2) = \min_{\tau=\max(t, s_1-1), \dots, s_2} \left\{ c_t^\ell(d_{s_1\tau}) + C_{t,\ell+1}(s_1, \tau) + h_t^\ell(d_{\tau+1, s_2}) + C_{t+1, \ell}(\tau + 1, s_2) \right\}$$

$$\ell = L - 2, \dots, 1; t = T - 1, \dots, 1; s_1 = T, \dots, t; s_2 = T, \dots, s_1;$$

- and at the manufacturer level:

$$C_{t0}(s_1, T) = \min_{\tau=\max(t, s_1-1), \dots, T} \{ p_t(d_{s_1\tau}) + C_{t1}(s_1, \tau) + C_{t+1,0}(\tau + 1, T) \}$$

$$t = T - 1, \dots, 1; s_1 = T, \dots, t$$

$$C_{T0}(T, T) = p_T(d_{TT}) + C_{T1}(T, T).$$

Note that the last warehouse level (which actually coincides with the manufacturer level in case  $L = 2$ ) is treated differently from the remaining warehouse levels. The reason is that the ZIO property implies that if we do not supply demands in the current period, we will not transport to the retailer level. From the above recursions, it is easy to see that the dynamic programming algorithm runs in  $O(T^3 + (L - 2)T^4)$  time, which boils down to  $O(T^3)$  time for  $L = 2$ , and  $O(LT^4)$  for  $L > 2$ .

The arborescent structure is destroyed in the presence of initial inventories. This is illustrated in Figure 5. In this extreme point solution, the ZIO property is violated at node (2, 3), and therefore Zangwill's recursion does not apply. However, note that the uncapacitated MLSP with initial inventories can be handled with an approach similar to the one presented in Section 4.2.1. Note that, although it will be possible to obtain some savings due to the absence of production capacities, this algorithm will run in polynomial time in the planning horizon  $T$ , but will no longer be polynomial in the number of levels  $L$ .

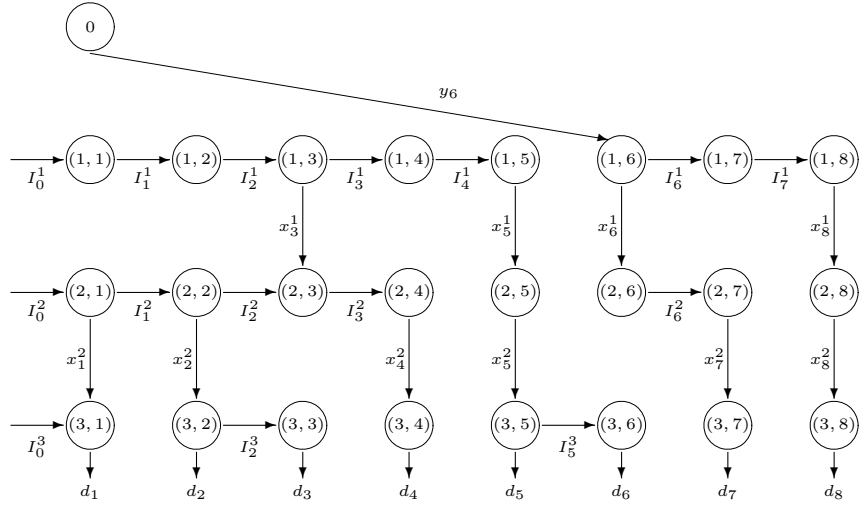

Figure 5: The presence of initial inventories destroys the arborescent structure.
